# Supplementary material for: Mapping cell type-specific transcriptional enhancers using high affinity, lineage-specific Ep300 bioChIP-seq
Source: eLife journal article supplement (doi:10.7554/elife.22039), 2017-01-25
Supplement: supp [file elife_poa_e22039_Figure_1_Supplement_1.pdf › elife_poa_e22039_Figure_1_Supplement_1.pdf]

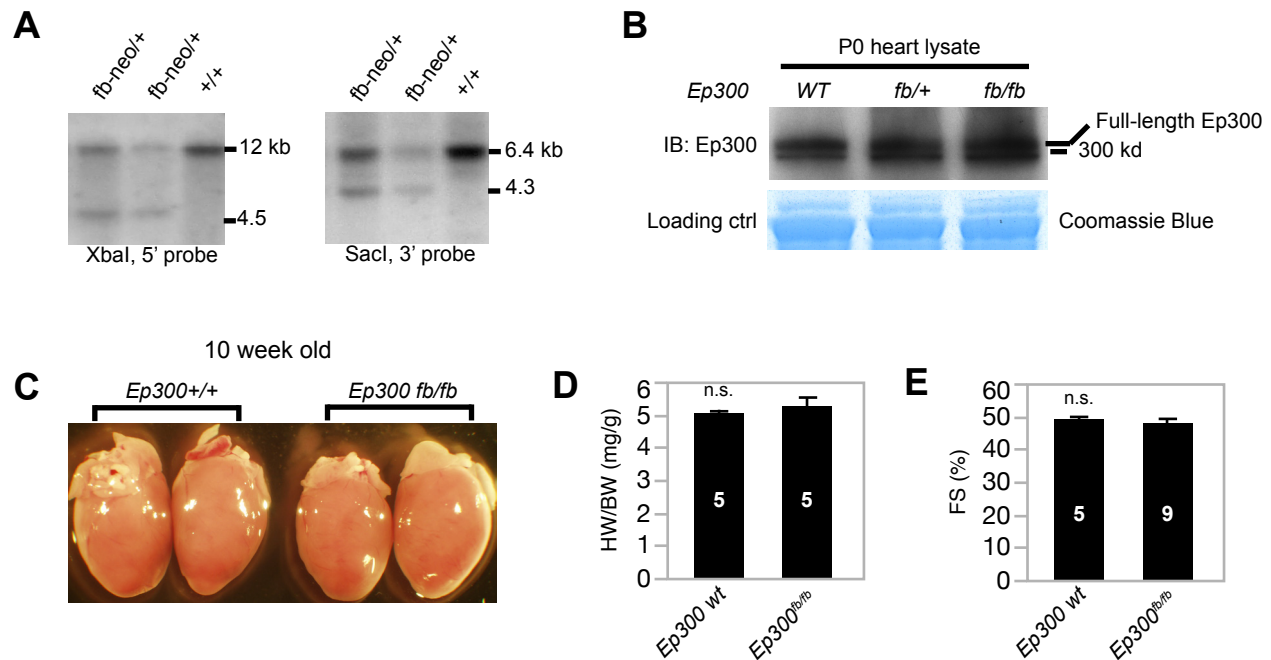

**Figure 1 -- figure supplement 1. Characterization of *Ep300<sup>fb</sup>* allele.**

**A.** Southern blot genotyping of *Ep300<sup>fb</sup>* allele. Probes are marked in Fig. 1B.

**B.** The expression level of tagged Ep300 protein is similar to that of wild-type Ep300 in neonatal mouse hearts.

**C, D.** The heart weight to body weight ratio of 10 week old *Ep300<sup>fb/fb</sup>* heart was not significantly different from littermates.

**E.** Echocardiograms of 10 week old *Ep300<sup>fb/fb</sup>* mice show that their ventricular function was not significantly different from littermate controls.

Sample sizes are shown in bars in D,E. Bars represent mean  $\pm$  standard deviation. n.s., not significantly different (t-test).
