# Supplementary material for: Mapping cell type-specific transcriptional enhancers using high affinity, lineage-specific Ep300 bioChIP-seq
Source: eLife journal article supplement (doi:10.7554/elife.22039), 2017-01-25
Supplement: supp [file elife_poa_e22039_Figure_3_Supplement_1.pdf › elife_poa_e22039_Figure_3_Supplement_1.pdf]

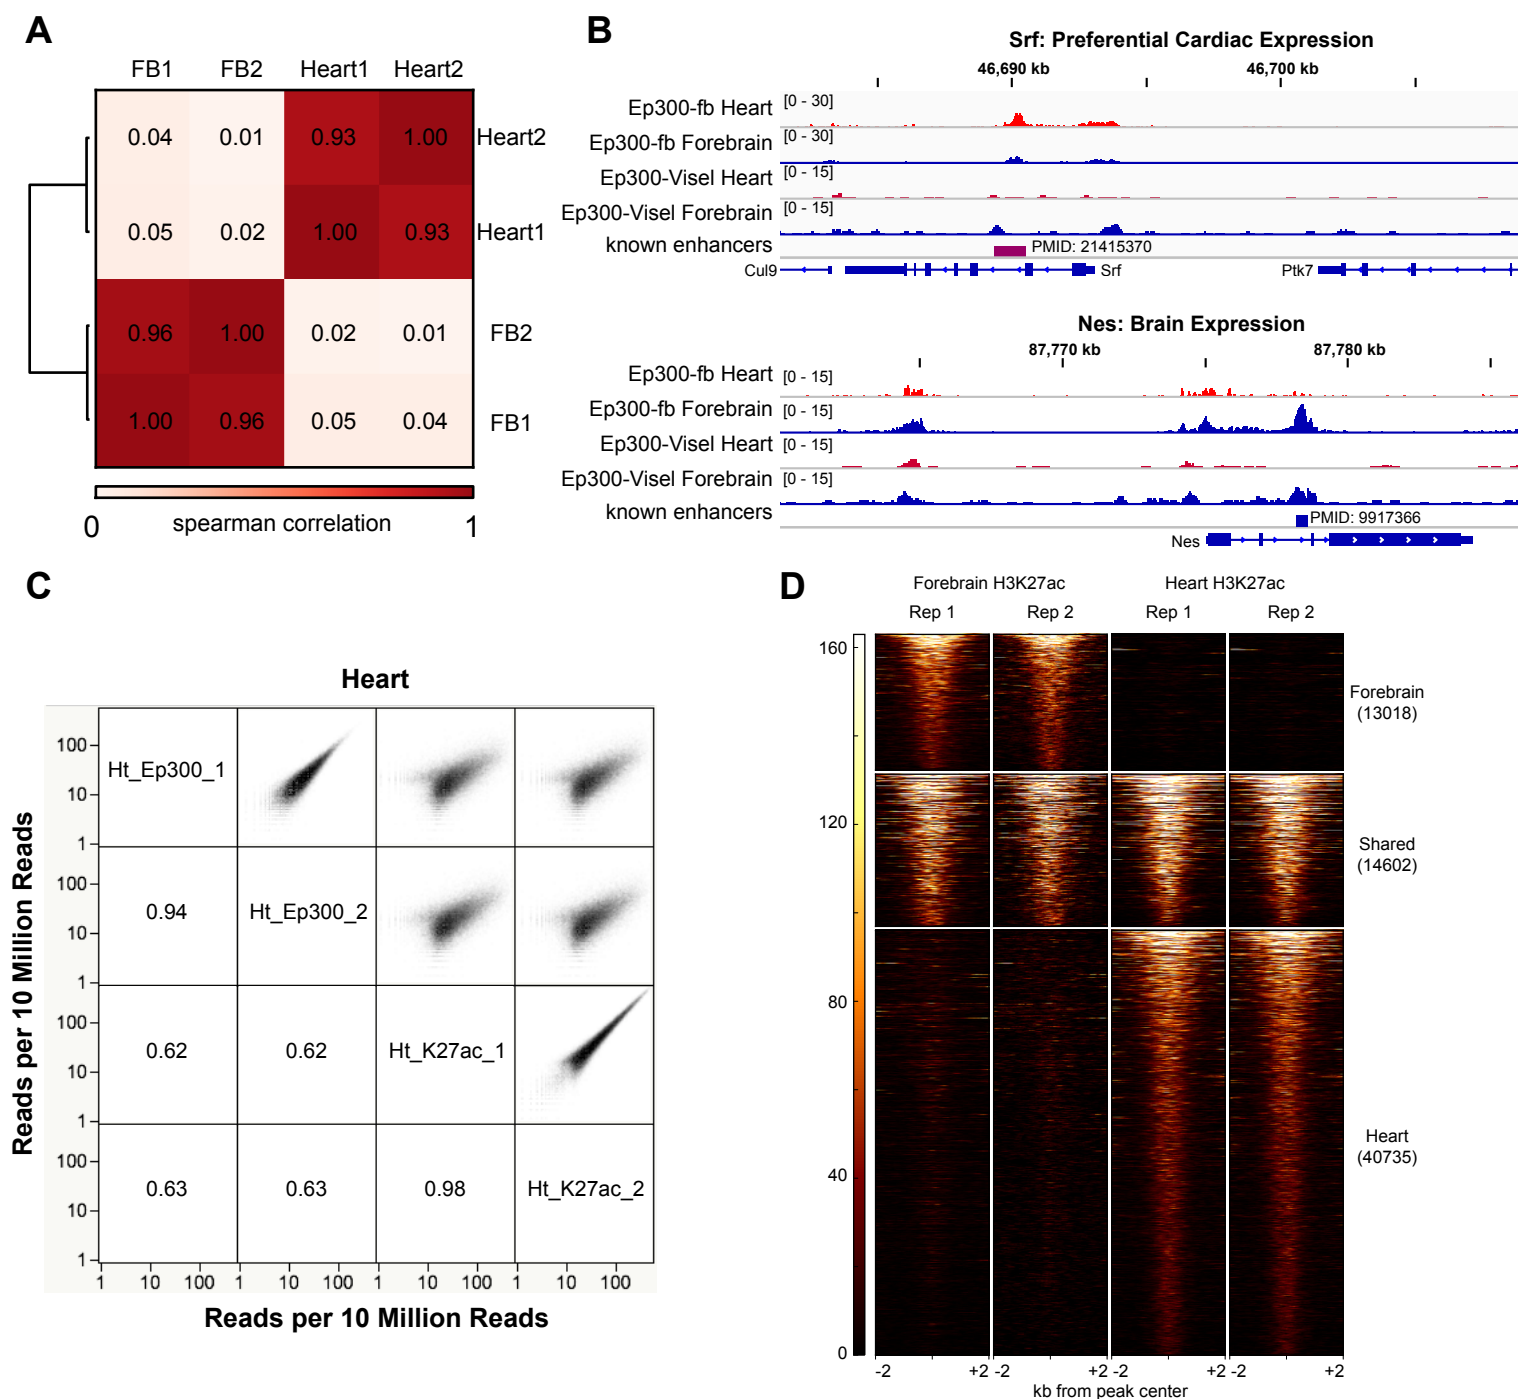

**Figure 3 -- figure supplement 1. Heart and forebrain Ep300 bioChIP-seq.** **A.** Ep300 bioChIP-seq signals within called Ep300 peaks were highly correlated between biological replicates and discordant between heart and forebrain. **B.** Genome browser views showing Ep300 bioChIP-seq signal in heart and brain at *Srf* (preferential cardiac expression) and *Nes* (preferential Brain expression). **C.** Comparison of Ep300 bioChIP-seq and H3K27ac ChIP-seq signals in heart. Numbers indicate correlation coefficients. There was excellent correlation between biological replicates of Ep300 or H3K27ac. Ep300 and H3K27ac also showed highly significant genome-wide correlation. Similar results were observed in forebrain (data not shown). **D.** Tag heatmap of H3K27ac-bound regions showing overlap between heart and brain H3K27ac enriched regions from each tissue.
