# Supplementary material for: Mapping cell type-specific transcriptional enhancers using high affinity, lineage-specific Ep300 bioChIP-seq
Source: eLife journal article supplement (doi:10.7554/elife.22039), 2017-01-25
Supplement: supp [file elife_poa_e22039_Figure_3_Supplement_2.pdf › elife_poa_e22039_Figure_3_Supplement_2.pdf]

**A**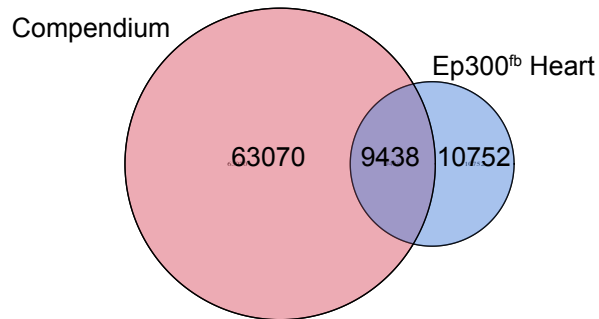**B**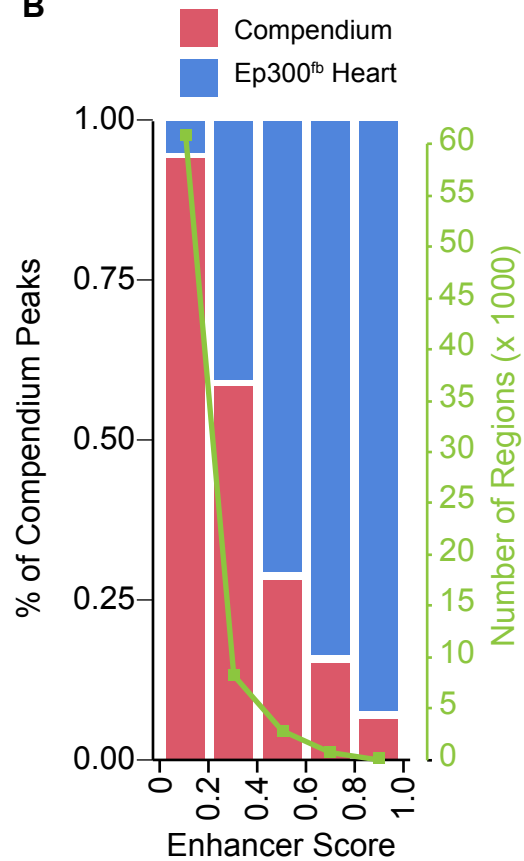

**Figure 3 -- figure supplement 2. Comparison of heart Ep300<sup>fb</sup> regions to a compendium of heart enhancers assembled by Dickel et al. (2016).** This compendium was based on H3K27ac ChIP-seq and Ep300 antibody ChIP-seq. Most compendium regions had low enhancer scores and are not expected to validate in transient transgenic assays. **A.** Venn diagram showing that 47% of Ep300<sup>fb</sup> heart regions overlap with heart compendium regions. **B.** Analysis of the fraction of compendium regions that overlap the Ep300<sup>fb</sup> heart regions, as a function of enhancer score.
