# Supplementary material for: Mapping cell type-specific transcriptional enhancers using high affinity, lineage-specific Ep300 bioChIP-seq
Source: eLife journal article supplement (doi:10.7554/elife.22039), 2017-01-25
Supplement: supp [file elife_poa_e22039_Figure_3_Supplement_3.pdf › elife_poa_e22039_Figure_3_Supplement_3.pdf]

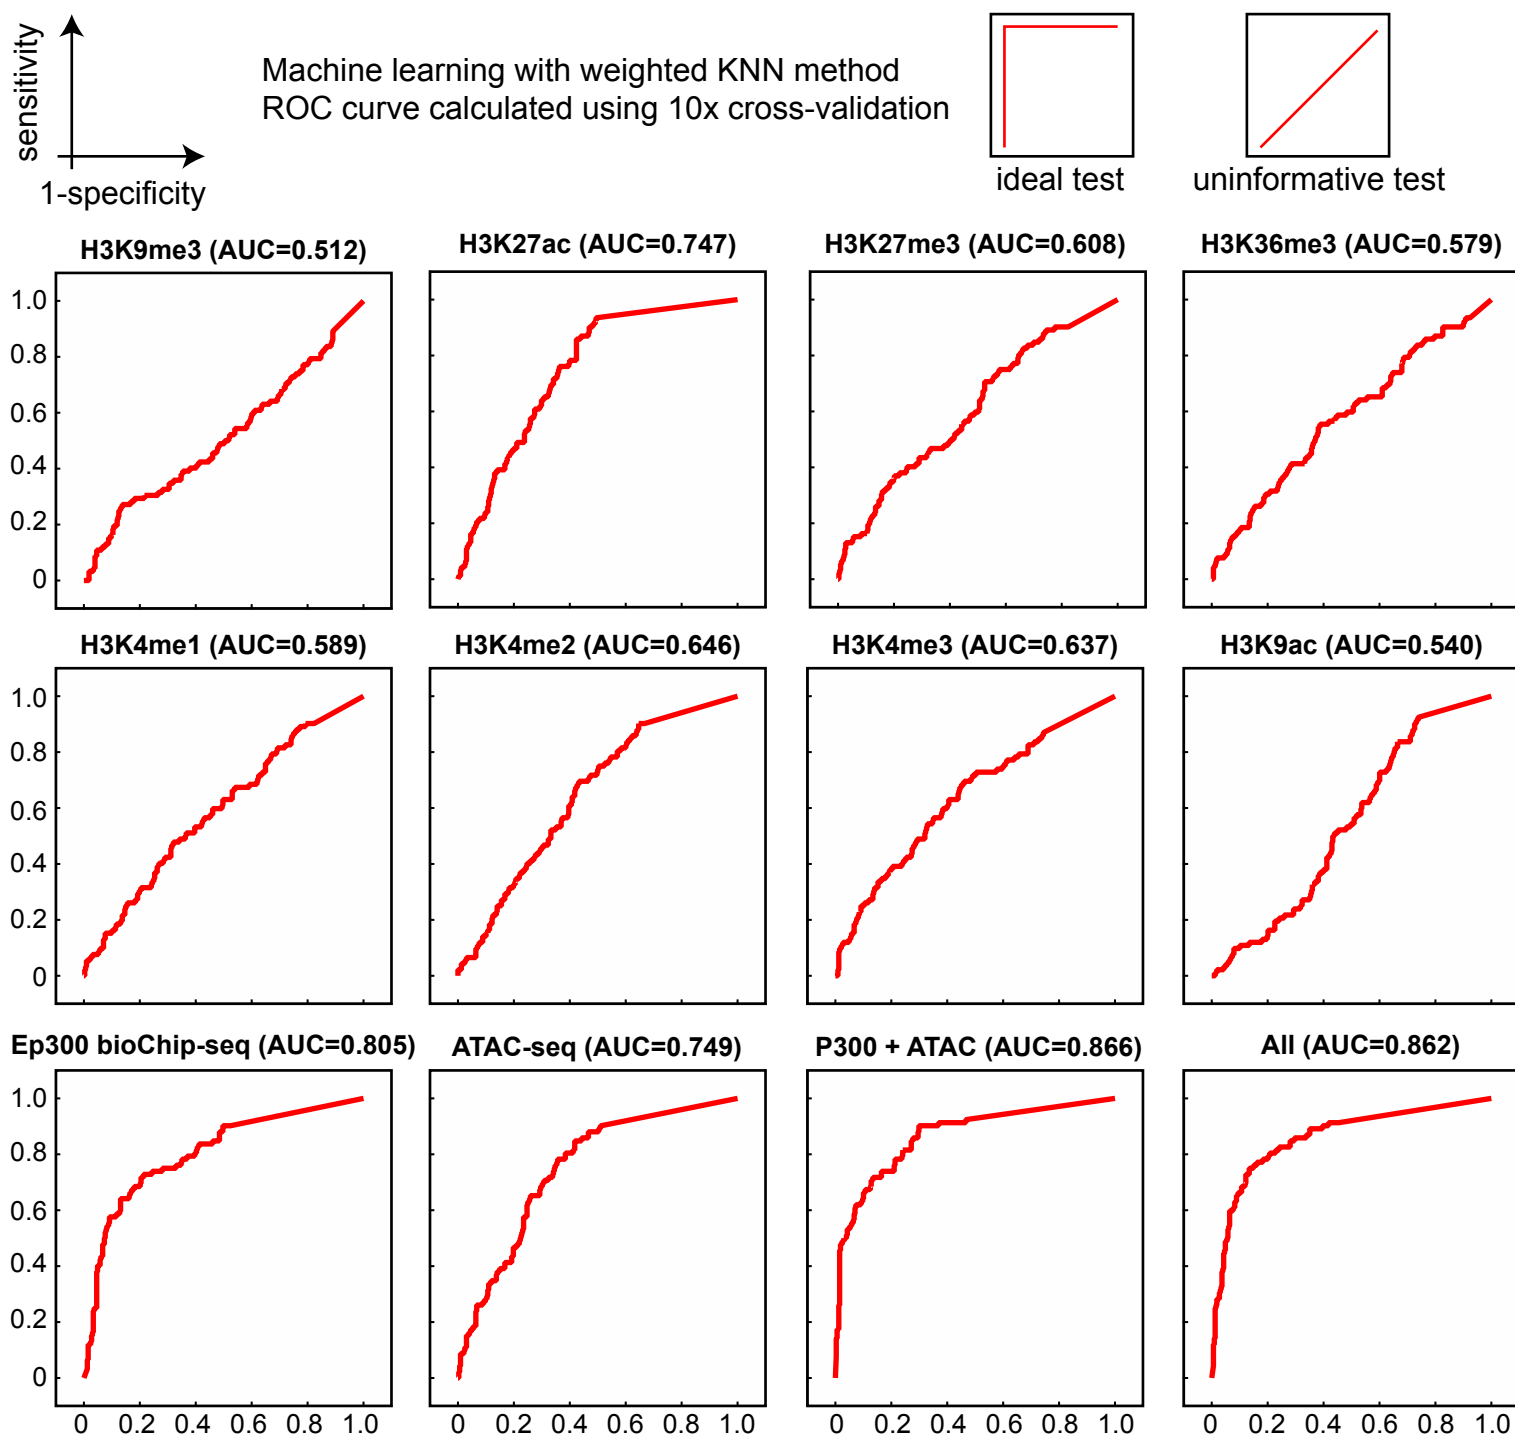

**Figure 3 -- figure supplement 3. Comparison of enhancer prediction based on indicated chromatin features of E12.5 heart.** Data are from ENCODE except for ATAC-seq (Pu lab, unpublished) and Ep300fb (this manuscript). The KNN classifier was trained on a subset of the VISTA enhancer database and the validated on the remaining data, using a 10x cross-validation design. Ep300 was the most accurate single predictor, based on the area under the receiver operating characteristic curve (AUC, indicated in parentheses). All of the features together (All), or just Ep300 plus ATAC-seq together (not shown), gave the best prediction.
