# Supplementary material for: Mapping cell type-specific transcriptional enhancers using high affinity, lineage-specific Ep300 bioChIP-seq
Source: eLife journal article supplement (doi:10.7554/elife.22039), 2017-01-25
Supplement: supp [file elife_poa_e22039_Figure_4_Supplement_1.pdf › elife_poa_e22039_Figure_4_Supplement_1.pdf]

**A**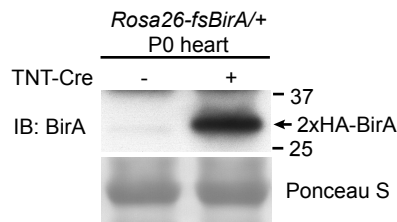**B**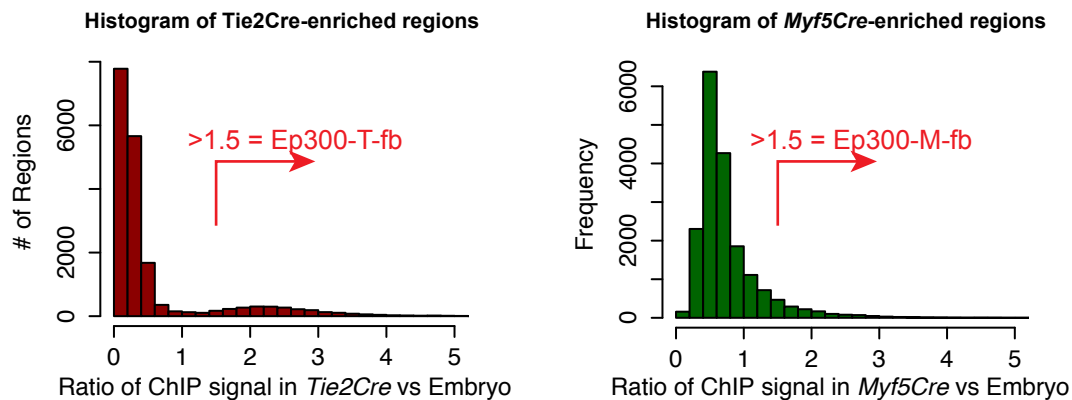**C**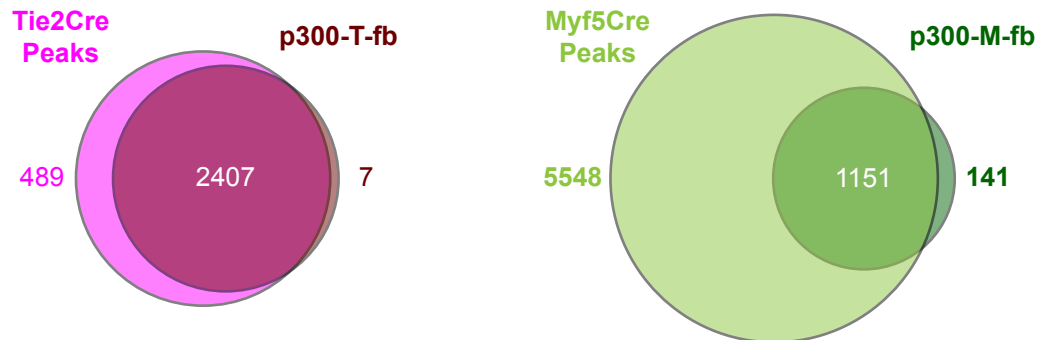

**Figure 4 -- figure supplement 1. Cre-dependent Ep300 bioChIP-seq. A.** Cre-dependent expression of BirA. Heart with or without cardiac-specific *TNTCre* was immunoblotted for expression of BirA from the *Rosa26<sup>fsBirA</sup>* allele. **B.** Distribution of Ep300<sup>fb</sup> bioChIP-seq signal when driven by *Tie2Cre* or *Myf5Cre*. Regions with p300 peaks called in samples from any of the three Cre drivers were scored for their EC- or muscle- enriched signal by calculating ratio of the region's signal in *Tie2Cre* or *Myf5Cre* bioChIP-seq to its signal with ubiquitous Ep300 bioChIP-seq (*EllaCre*). The *Tie2Cre*-enrichment score showed a bimodal distribution with a small peak at values greater than 1.5. A value of greater than 1.5 similarly was used to define *Myf5Cre*-enriched regions. **C.** Relationship of *Tie2Cre*-enriched (Ep300-T-fb) and *Myf5Cre*-enriched (Ep300-M-fb) regions to peaks called from *Tie2Cre* or *Myf5Cre* samples alone.
