# Supplementary material for: Mapping cell type-specific transcriptional enhancers using high affinity, lineage-specific Ep300 bioChIP-seq
Source: eLife journal article supplement (doi:10.7554/elife.22039), 2017-01-25
Supplement: supp [file elife_poa_e22039_Figure_5_Supplement_1.pdf › elife_poa_e22039_Figure_5_Supplement_1.pdf]

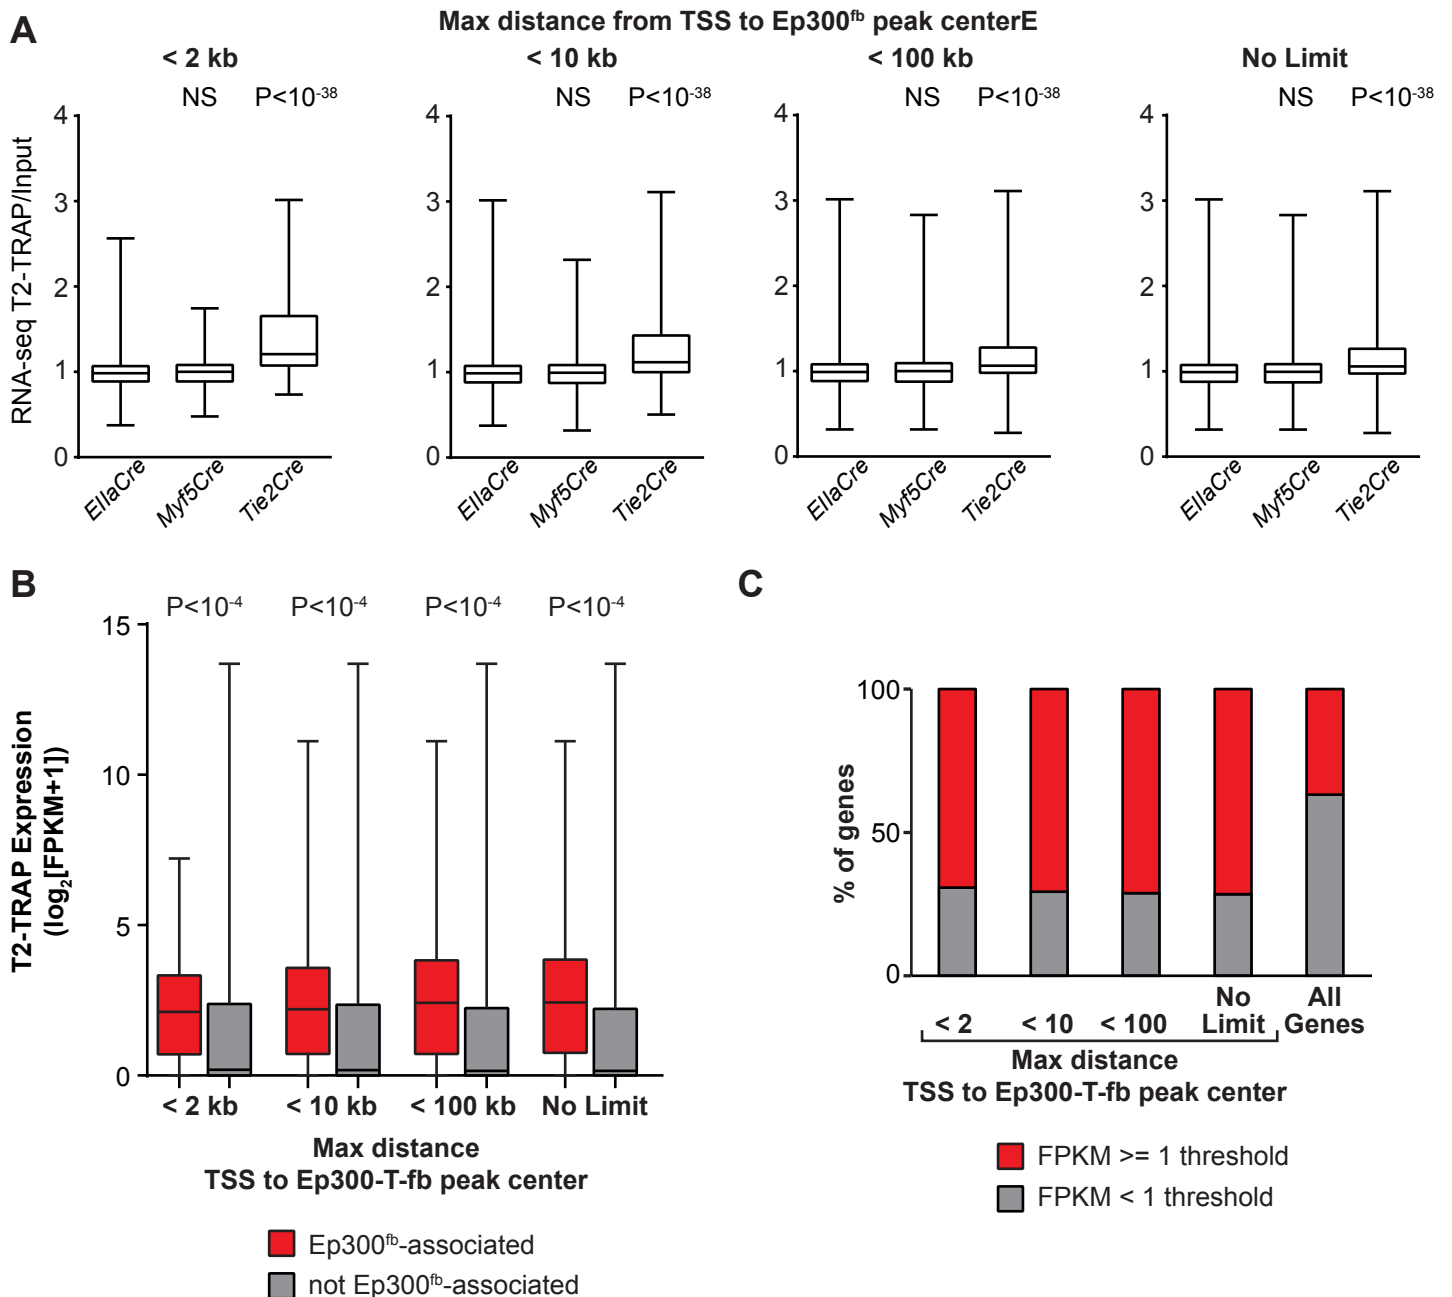

**Fig. 5 -- figure supplement 1. Relationship of EC gene expression to Ep300 regions in ECs, skeletal muscle, and whole embryo.**

- A.** EC enrichment of actively translating genes that neighbored Ep300 regions in skeletal muscle (Ep300-M-fb), whole embryo (Ep300-E-fb), and endothelial cell/blood (Ep300-T-fb), using several different thresholds for the maximum distance allowed to associate genes to regions. The relationship between Ep300-T-fb regions and gene expression was not dependent upon the threshold used. The rightmost panel (no limit to maximum distance) is the same as in Figure 5A. Mann-Whitney U-test.
- B.** EC expression of actively translating genes that neighbored Ep300-T-fb, compared to those that did not, using several different thresholds for the maximum distance used associate genes to regions. Ep300-T-fb-associated genes were more highly expressed regardless of the distance threshold used. Ep300-T-fb genes were significantly more highly expressed (Mann-Whitney U-test).
- C.** Fraction of genes expressed or not expressed, for Ep300-T-fb-associated genes compared to all genes. Ep300-T-fb associated genes were more frequently expressed than non-associated genes. However, not all genes associated with Ep300-T-fb regions were expressed, and some genes without Ep300-T-fb regions were expressed. This may reflect additional mechanisms of gene regulation as well as limitations of the gene-to-region association rule additional rule.
