# Supplementary material for: Mapping cell type-specific transcriptional enhancers using high affinity, lineage-specific Ep300 bioChIP-seq
Source: eLife journal article supplement (doi:10.7554/elife.22039), 2017-01-25
Supplement: supp [file elife_poa_e22039_Figure_5_Supplement_2.pdf › elife_poa_e22039_Figure_5_Supplement_2.pdf]

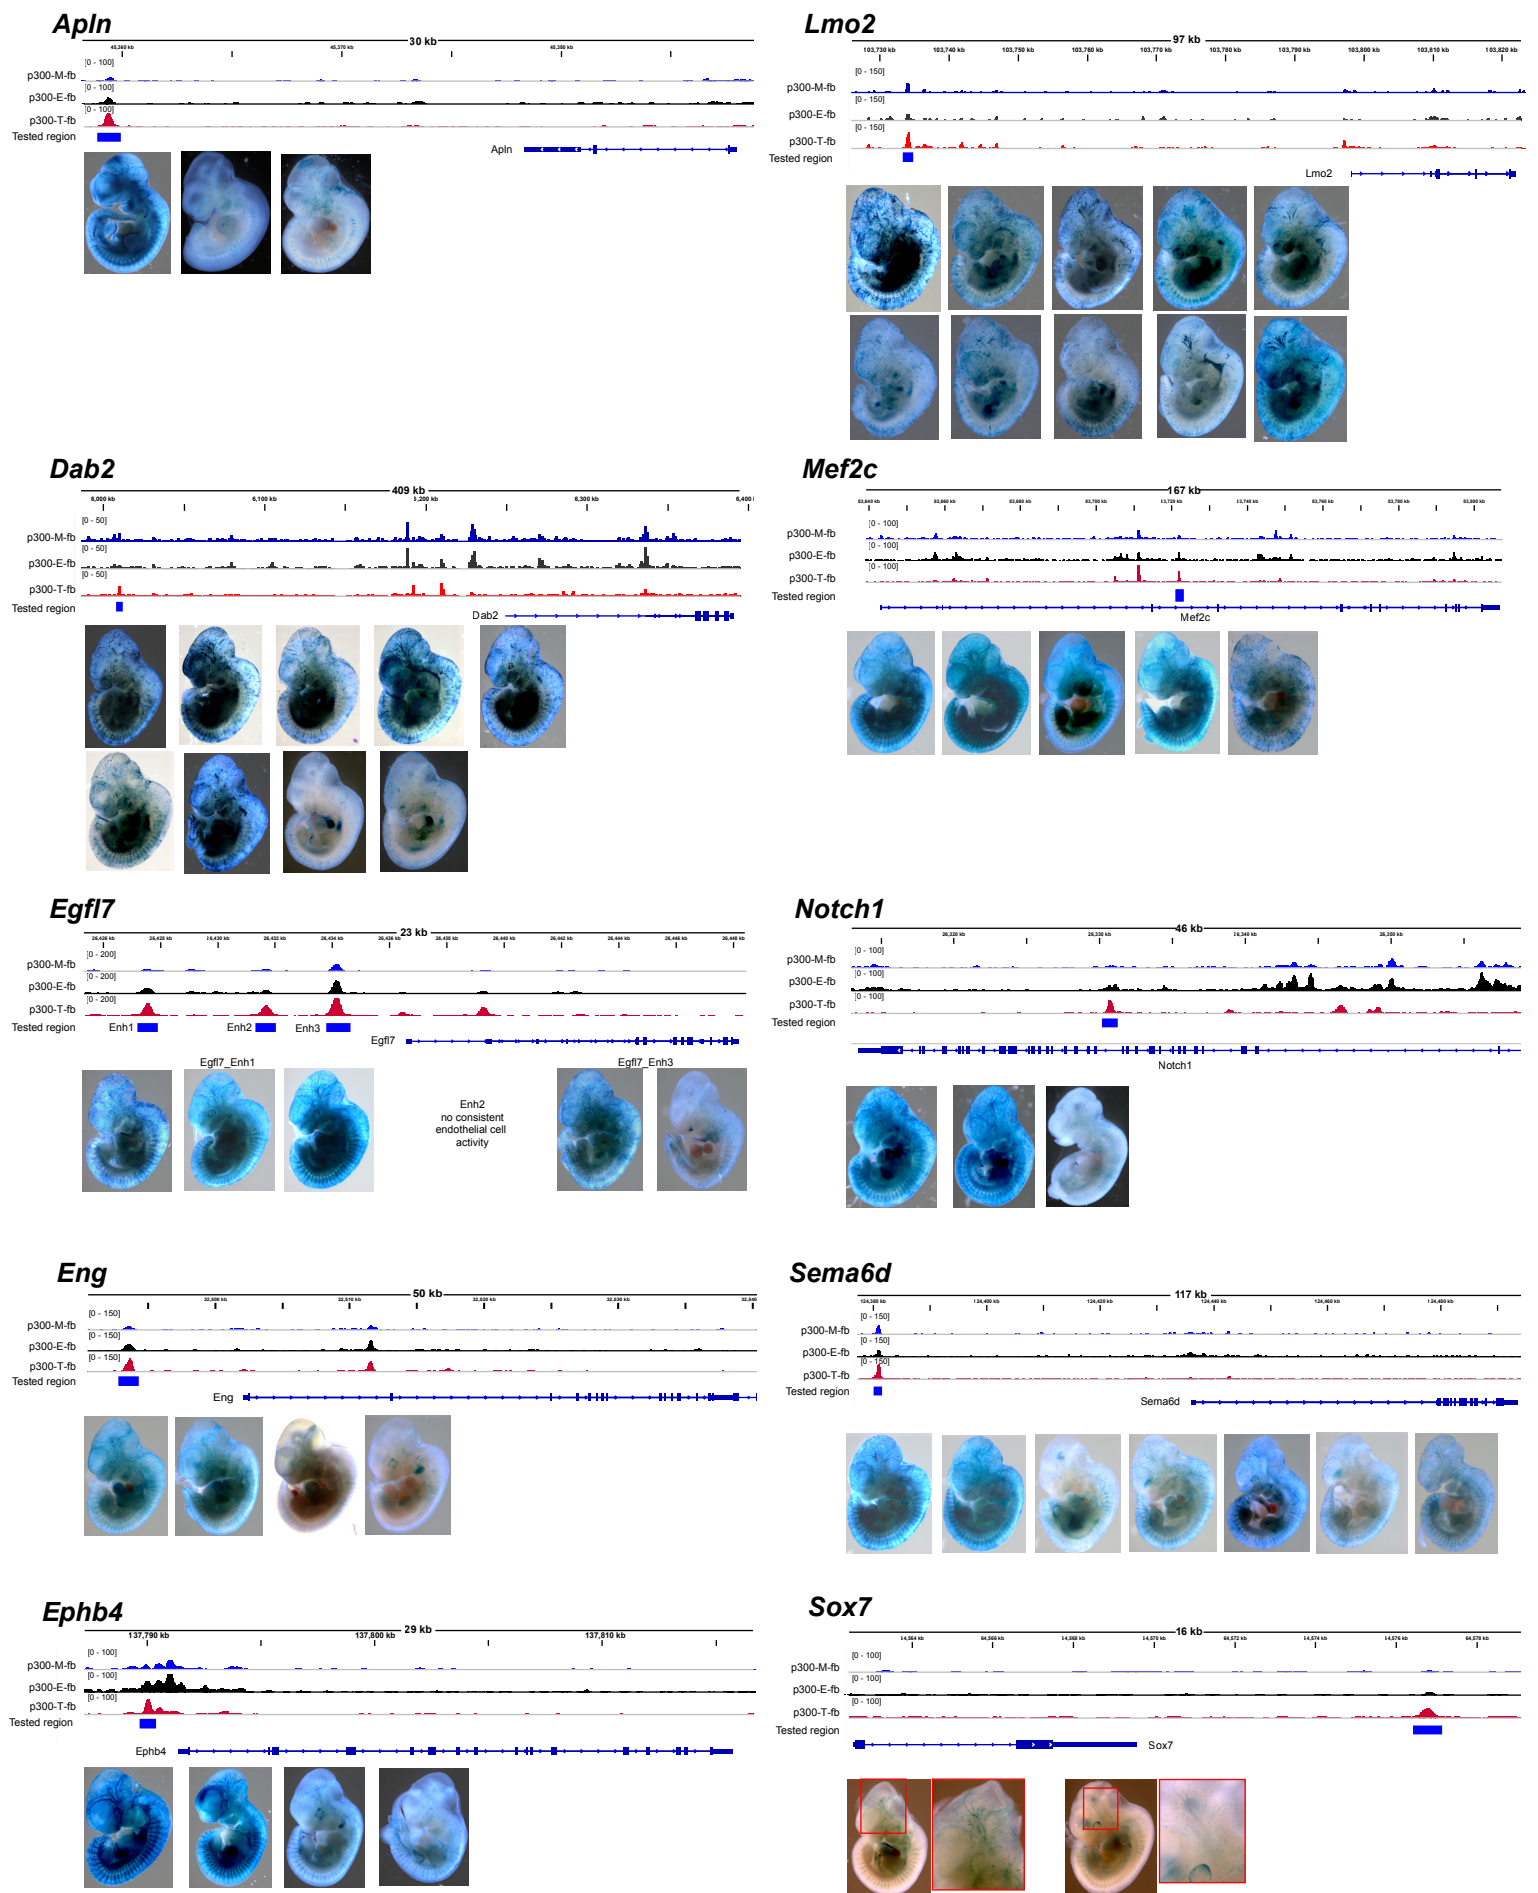

Fig. 5 -- figure supplement 2

**Fig. 5 -- figure supplement 2. Transient transgenic assays to measure in vivo activity of candidate endothelial cell/blood enhancers.** For each tested enhancer with positive endothelial cell or blood activity, we show the candidate enhancer's Ep300 signal in skeletal muscle (Ep300-M-fb), whole embryo (Ep300-E-fb), and endothelial cell/blood (Ep300-T-fb), with respect to the gene both. The whole mount images show each of the positive Xgal-stained embryos.
