# Supplementary material for: Mapping cell type-specific transcriptional enhancers using high affinity, lineage-specific Ep300 bioChIP-seq
Source: eLife journal article supplement (doi:10.7554/elife.22039), 2017-01-25
Supplement: supp [file elife_poa_e22039_Figure_5_Supplement_3.pdf › elife_poa_e22039_Figure_5_Supplement_3.pdf]

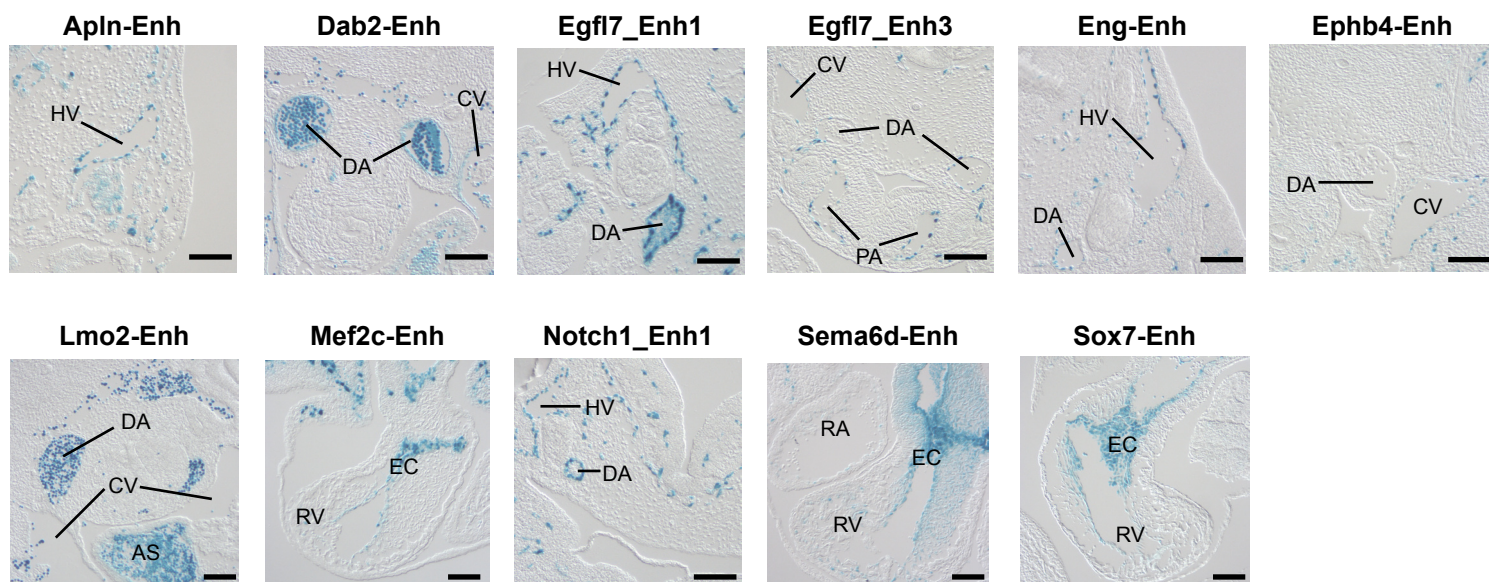

**Fig. 5 -- figure supplement 3. Histological sections of transient transgenic embryos.** Histological sections of embryos containing the indicated enhancer-driven lacZ transgene. AS: aortic sac; CV: cardinal vein; DA: dorsal aorta; EC: endocardial cushion; HV: head vein; PA: pulmonary artery; RA: right atrium; RV: right ventricle. Bar, 100  $\mu$ m.
