# Supplementary material for: Mapping cell type-specific transcriptional enhancers using high affinity, lineage-specific Ep300 bioChIP-seq
Source: eLife journal article supplement (doi:10.7554/elife.22039), 2017-01-25
Supplement: supp [file elife_poa_e22039_Figure_6_Supplement_1.pdf › elife_poa_e22039_Figure_6_Supplement_1.pdf]

| Ep300-T-fb |                 |                 |               | Ep300-M-fb |                 |                 |               |
|------------|-----------------|-----------------|---------------|------------|-----------------|-----------------|---------------|
|            | -ln P<br>-value | % of<br>Targets | Best<br>Match |            | -ln P<br>-value | % of<br>Targets | Best<br>Match |
|            | 879             | 48.7            | GATA          |            | 1049            | 68.0            | Ebox          |
|            | 855             | 57.0            | ETS           |            | 111             | 32.9            | TEAD          |
|            | 199             | 19.0            | Sox           |            | 58              | 31.5            | PBX:Homeo     |
|            | 149             | 14.7            | ETS:Ebox      |            | 53              | 21.6            | Ebox          |
|            | 105             | 16.9            | Fox           |            | 51              | 5.7             | Ebox          |
|            | 84              | 15.9            | KLF           |            | 50              | 28.2            | Nuc. Recept.  |
|            | 83              | 11.8            | AP1           |            | 41              | 27.7            | Homeo         |
|            | 69              | 3.9             | Mef2          |            | 35              | 3.2             | Hox           |
|            | 61              | 10.3            | ATF           |            | 32              | 3.4             | Mef2          |
|            | 46              | 16.5            | Ebox          |            | 32              | 8.6             | Meis1         |

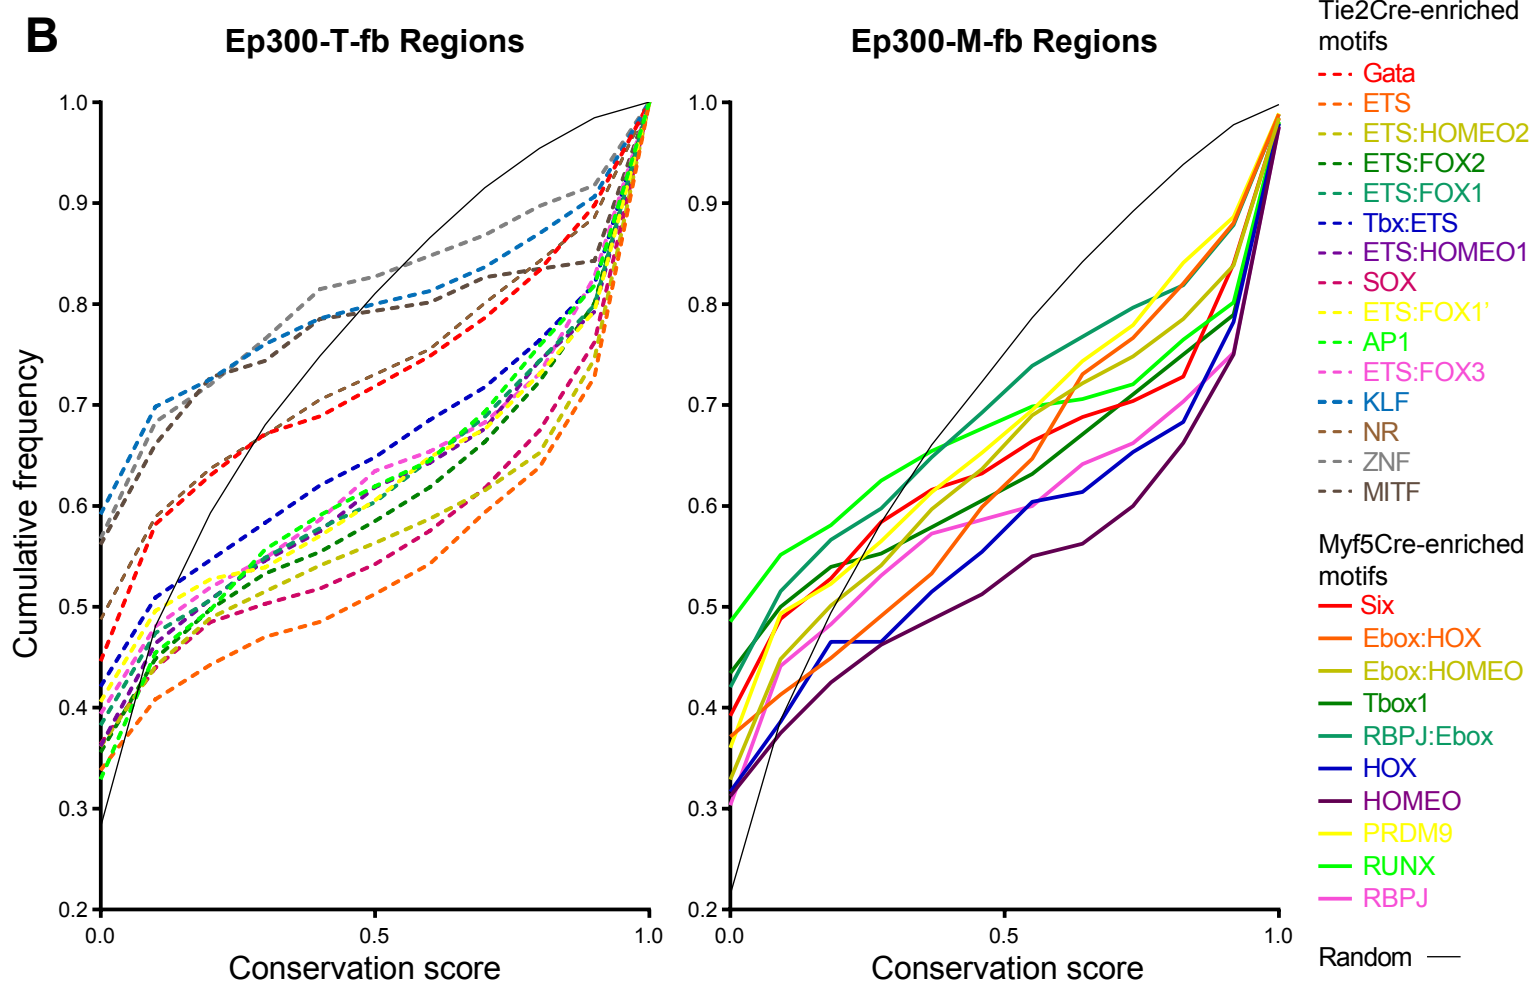

**Fig. 6 -- figure supplement 1. Motifs with enriched p300 occupancy in *Tie2Cre* or *Myf5Cre* embryo samples. A.** De novo motif discovery. The top 10 discovered motifs are shown, with the significance P-value, percent of regions containing the motif, and the best matching known motif class. **B.** Conservation of *Tie2Cre*-enriched motifs (dashed lines) or *Myf5Cre*-enriched motifs (solid lines) within 100 bp of Ep300-T-fb or Ep300-M-fb peak summits. The distribution of conservation scores for each indicated motif is shown as a cumulative frequency plot. Random indicates randomly sampled 12 nt regions from within the Ep300-T-fb or Ep300-M-fb regions.
