# Supplementary material for: Mapping cell type-specific transcriptional enhancers using high affinity, lineage-specific Ep300 bioChIP-seq
Source: eLife journal article supplement (doi:10.7554/elife.22039), 2017-01-25
Supplement: supp [file elife_poa_e22039_Figure_7_Supplement_1.pdf › elife_poa_e22039_Figure_7_Supplement_1.pdf]

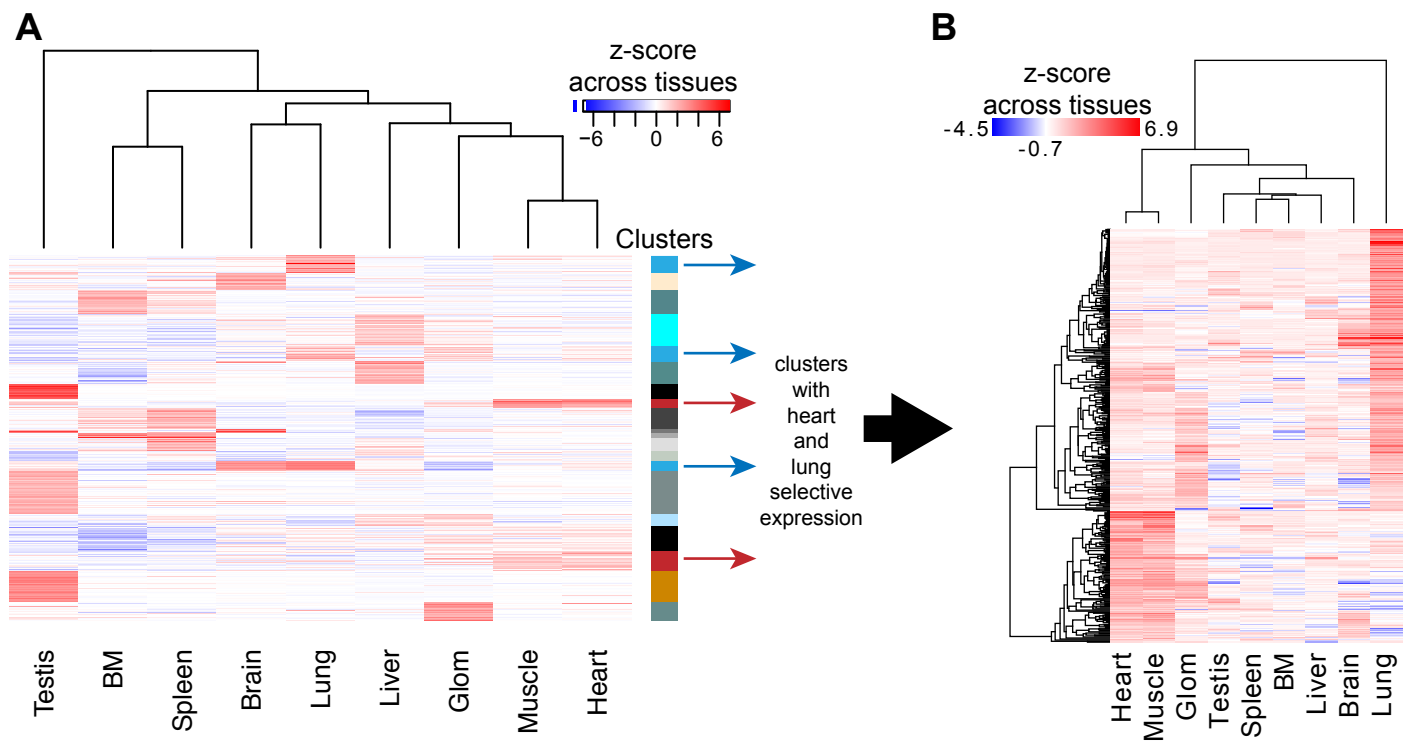

**Figure 7 -- figure supplement 1. Organ-specific EC gene expression.** Genes with at least 4-fold differential mean expression between highest and lowest EC samples were identified from microarray data (Nolan 2013). These genes were grouped by k-means clustering. Genes in clusters containing selective heart or lung expression were analyzed further. Expression of these heart or lung EC genes is displayed in B using hierarchical clustering.
