# Supplementary material for: Mapping cell type-specific transcriptional enhancers using high affinity, lineage-specific Ep300 bioChIP-seq
Source: eLife journal article supplement (doi:10.7554/elife.22039), 2017-01-25
Supplement: supp [file elife_poa_e22039_Figure_7_Supplement_2.pdf › elife_poa_e22039_Figure_7_Supplement_2.pdf]

**A**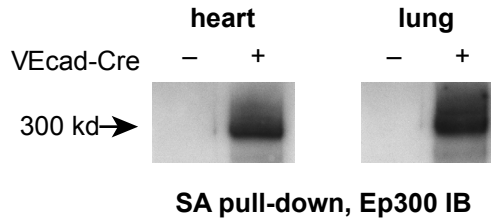**B**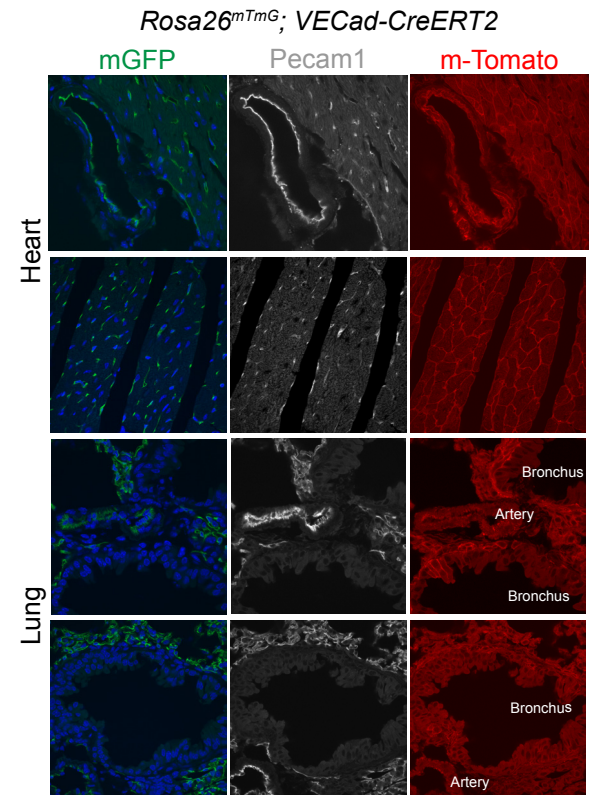

**Fig. 7 -- figure supplement 2. VECad-CreERT2 activation of Ep300 biotinylation.**  
**A.** VECad-CreERT2 activated Ep300 biotinylation by *Rosa26<sup>fsBirA</sup>*, permitting its pull-down on streptavidin (SA) beads. **B.** EC-selective activation of the *Rosa26<sup>mTmG</sup>* Cre reporter allele by VECad-CreERT2. Tamoxifen was administered at P1 and P2, and tissues were analyzed at 6 weeks of age.
