# Supplementary material for: Mapping cell type-specific transcriptional enhancers using high affinity, lineage-specific Ep300 bioChIP-seq
Source: eLife journal article supplement (doi:10.7554/elife.22039), 2017-01-25
Supplement: supp [file elife_poa_e22039_Figure_7_Supplement_3.pdf › elife_poa_e22039_Figure_7_Supplement_3.pdf]

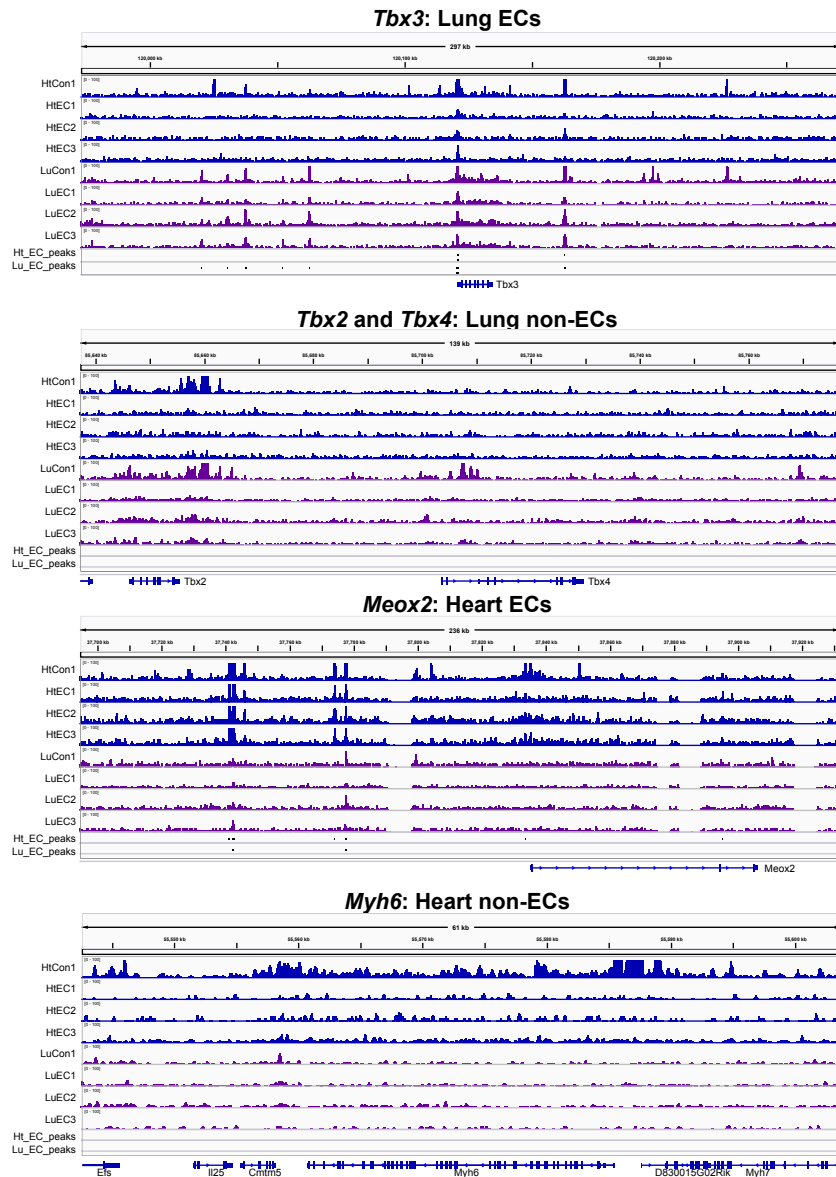

**Figure 7 -- figure supplement 3.** Ep300<sup>fb</sup> bioChIP-seq signal in whole organ ("Con"; *EllaCre*) or ECs ("EC"; *VEcad-CreERT2*) at genes with EC or non-EC expression in lung or heart.
