# Supplementary material for: Mapping cell type-specific transcriptional enhancers using high affinity, lineage-specific Ep300 bioChIP-seq
Source: eLife journal article supplement (doi:10.7554/elife.22039), 2017-01-25
Supplement: supp [file elife_poa_e22039_Figure_7_Supplement_4.pdf › elife_poa_e22039_Figure_7_Supplement_4.pdf]

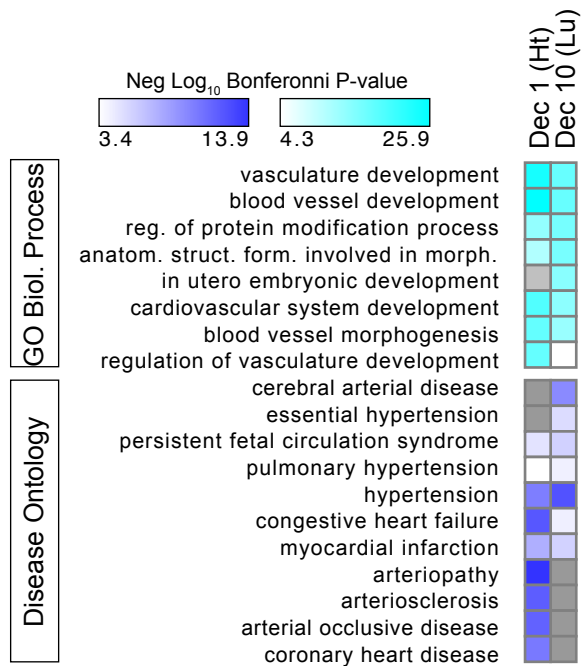

**Figure 7 -- figure supplement 4. GO biological process (top) or disease ontology (bottom) terms enriched in decile 1 or decile 10 of Ep300-VE-fb regions.** Grey indicates no significant enrichment. The top five biological process terms in deciles 1 and 10 and selected relevant disease ontology terms were displayed.
