# Supplementary material for: Mapping cell type-specific transcriptional enhancers using high affinity, lineage-specific Ep300 bioChIP-seq
Source: eLife. 2017 Jan 25;6:e22039. doi: 10.7554/eLife.22039 (PMC5295818; doi:10.7554/eLife.22039)
Supplement: Supplementary file 2. — E10.5 embryo T2-TRAP and input RNA-seq data were analyzed to identify DNA-binding transcriptional regulators with detectable expression level in ECs (T2-TRAP log2 (fpkm +1)>0.8) and preferential EC expression (T2-TRAP/input >1). Genes with DNA binding domains belonging to the indicated families were annotated based on literature searches and previously publshed catalogs of transcriptional regulators (Fulton et al., 2009; Kanamori et al., 2004). DOI: http://dx.doi.org/10.7554/eLife.22039.026 [file elife-22039-supp2.xlsx]

## Sheet: Suppl. Table 2
GeneSymbol	DBD	T2_TRAP_log2(FPKM+1)	T2_input_log2(FPKM+1)	T2TRAP_Input_Ratio
Atf3	ATF	3.31513	1.11061	6.53425
Atf6	ATF	2.87076	2.5011	1.14629
Bhlhe40	bHLH	2.28031	1.33823	2.13576
Epas1	bHLH	5.65558	2.42045	9.60327
Hand1	bHLH	4.99024	3.06139	3.54505
Hand2	bHLH	4.63716	3.96726	1.38036
Hey1	bHLH	5.61463	3.66511	3.47552
Hey2	bHLH	4.11186	2.55755	2.82048
Hif3a	bHLH	3.3598	2.17525	2.22953
Id1	bHLH	3.84986	3.60939	1.01333
Id3	bHLH	5.76115	5.20692	1.25352
Lmo2	bHLH	5.98082	2.99667	7.53307
Lyl1	bHLH	3.0172	1.06027	5.53226
Mlx	bHLH	3.96011	3.18298	1.5248
Mxd4	bHLH	3.87348	3.34238	1.26391
Myc	bHLH	4.06422	3.70059	1.10893
Tal1	bHLH	3.86032	2.23217	3.09403
Tcf7	bHLH	4.62093	4.14044	1.20067
Bach1	bZIP	4.76355	4.46342	1.05113
Creb3	bZIP	3.22968	2.93352	1.06801
Creb3l1	bZIP	4.99714	2.55541	5.366
Creb3l2	bZIP	3.80228	3.38207	1.16262
Creb5	bZIP	1.96307	1.76379	1.02381
Crem	bZIP	2.56637	1.84432	1.60788
Fosl2	bZIP	2.04585	0.794597	3.6044
Jun	bZIP	4.38084	4.14353	1.00652
Junb	bZIP	2.20363	0.8427	3.84615
Maf	bZIP	3.03335	2.36367	1.46655
Mafb	bZIP	2.37168	2.17604	1.00396
Maff	bZIP	3.00395	1.6145	2.88142
Mafk	bZIP	2.21327	1.51182	1.66209
Nfe2	bZIP	2.80084	1.5382	2.65198
Nfe2l2	bZIP	4.47392	4.01346	1.18529
Xbp1	bZIP	5.19973	4.49546	1.40336
Elf1	ETS	3.51962	3.01697	1.24855
Elf4	ETS	3.70562	1.72046	4.44081
Elk3	ETS	6.81058	3.78423	7.36739
Erf	ETS	3.6186	2.99243	1.37209
Erg	ETS	5.30059	2.33105	8.06192
Ets1	ETS	6.53772	4.10329	4.80419
Ets2	ETS	5.71719	4.01249	2.88443
Etv2	ETS	0.946973	0.351448	2.84615
Etv6	ETS	4.28987	3.69925	1.30992
Fev	ETS	1.64931	0.199162	12.2143
Fli1	ETS	5.72202	3.65223	3.78625
Foxc1	Fox	3.95841	3.71609	1.01366
Foxc2	Fox	3.25244	2.68721	1.3266
Foxf1a	Fox	3.05282	2.43887	1.3965
Foxf2	Fox	3.57065	2.44017	2.07982
Foxj2	Fox	2.22959	1.86481	1.18172
Foxl2	Fox	3.05309	1.74177	2.63467
Foxo1	Fox	4.08033	2.46552	2.97742
Foxq1	Fox	1.90766	0.245635	12.5455
Gata1	Gata	2.44734	1.53036	1.99561
Gata2	Gata	3.59065	1.77434	3.86145
Gata3	Gata	2.60384	2.31731	1.07872
Gata4	Gata	3.59043	1.62536	4.48222
Gata5	Gata	2.92318	1.67024	2.55286
Gata6	Gata	3.975	2.43819	2.8192
Sox13	HMG-box	3.56925	3.21884	1.10678
Sox17	HMG-box	3.72643	0.971877	10.7696
Sox18	HMG-box	5.08344	1.41831	16.6453
Sox7	HMG-box	6.02958	2.20522	15.0714
Hesx1	Homeo	0.960853	0.684858	1.31818
Hhex	Homeo	4.13283	1.17451	11.1347
Hlx	Homeo	3.85742	1.74776	4.84164
Irx6	Homeo	1.02002	0.45358	2.35443
Lhx6	homeo	3.13287	1.59818	3.2433
Pitx2	homeo	2.67516	2.02632	1.48303
Hoxa1	Hox	1.75946	1.29392	1.39035
Klf1	Kruppel	2.85816	2.34407	1.29723
Klf10	Kruppel	3.96364	2.9954	1.77151
Klf13	Kruppel	3.66439	3.21471	1.19298
Klf16	Kruppel	2.76161	1.93748	1.72842
Klf2	Kruppel	4.24288	1.38994	9.36316
Klf3	Kruppel	4.52579	4.16971	1.09697
Klf4	Kruppel	2.80908	1.04433	4.78537
Klf6	Kruppel	4.86856	3.98885	1.60472
Klf7	Kruppel	3.40548	2.90611	1.25
Mef2a	MADS	5.41843	3.89392	2.54883
Mef2c	MADS	5.13534	3.25553	3.37932
Mef2d	MADS	4.21258	2.9367	2.22962
Smad1	MH1	4.05317	3.80695	1.01574
Smad6	MH1	3.65214	2.23882	2.63212
Smad7	MH1	2.78331	2.17537	1.41571
Nfia	NFI	2.53323	2.21572	1.11162
Nfib	NFI	3.28267	3.00052	1.05503
Nfic	NFI	3.4162	2.13668	2.40967
Nfix	NFI	1.00708	0.520482	1.96689
Nkx2-3	Nkx	2.78857	1.08371	4.46667
Ncoa3	NR	3.80501	3.44671	1.10879
Nr3c1	NR	2.2556	1.77544	1.31818
Nr4a1	NR	2.16978	1.05395	2.75148
Nr5a2	NR	1.81219	0.678563	3.53901
Ppard	NR	3.42073	2.8348	1.33919
Rarg	NR	4.19636	3.77867	1.15262
Nfkb1	RelA	4.40582	3.21072	2.06951
Nfkb2	RelA	2.4812	1.62721	1.85647
Nfatc1	RHD	3.81228	1.47815	6.18198
Stat1	STAT	3.21858	2.04899	2.24031
Stat2	STAT	2.14852	1.7945	1.17681
Stat3	STAT	3.34943	2.21497	2.13529
Stat4	STAT	0.976819	0.727133	1.25
Stat5a	STAT	1.14645	0.4793	2.60606
Stat5b	STAT	2.67735	2.09832	1.39134
Stat6	STAT	2.94448	1.73137	2.44245
T	Tbox	1.78575	1.55982	1.06324
Tbx1	Tbox	3.7232	2.58292	2.06927
Tbx20	Tbox	3.96293	2.38303	2.92884
Tead4	TEA	3.21139	1.5813	3.509
Irf1	wHTH	1.87081	1.20471	1.72316
Irf2	wHTH	4.34988	3.05865	2.23789
Irf3	wHTH	3.17044	2.73443	1.19753
Irf5	wHTH	1.56598	0.993683	1.67376
Irf8	wHTH	1.28913	0.475682	3.12791
Egr1	ZnF	2.56244	1.38463	2.57729
Prdm1	ZnF	2.9773	1.20954	4.43182
Prdm11	ZnF	1.74627	1.40376	1.21066
Snai2	ZnF	4.75777	4.41281	1.08598
Zfp277	ZnF	4.48518	3.99394	1.21238
Zfp36	ZnF	2.25134	1.30347	2.16766
Zfp36l1	ZnF	4.44149	4.21128	1.0009
Zfp467	ZnF	2.56898	2.33464	1.03229
Zfp52	ZnF	1.43959	1.26853	1.02827
Zfp64	ZnF	3.3841	3.11832	1.0396
Zfpm1	ZnF	3.73604	3.01013	1.47792
Zfpm2	ZnF	2.08128	1.20033	2.10692
Zhx1	ZnF, homeo	4.15387	3.9082	1.01445
Zhx3	ZnF, homeo	2.31133	1.84157	1.29786

## Sheet: Legend
Supplementary File 2. Transcription factors expressed in embryonic ECs.
E10.5 embryo T2-TRAP and input RNA-seq data were analyzed to identify DNA-binding transcriptional regulators with detectable expression level in ECs (T2-TRAP log2 (fpkm+1)>0.8) and preferential EC expression (T2-TRAP/input > 1). Genes with DNA binding domains belonging to the indicated families were annotated based on literature searches and previously publshed catalogs of transcriptional regulat…
